# Supplementary material for: Modeling Emotion within Symbolic Cognitive Architectures
Source: Springer Nature journal article supplement (doi:10.1186/s12916-021-02157-4), 1998-01-01
Supplement: MOESM2 [file 19876648]

## **Additional file 2**

### **Supplementary results for the manuscript entitled “Effect of evidence updates on key determinants of measles vaccination impact: a DynaMICE modelling study in ten high-burden countries”**

Han Fu<sup>1</sup>, Kaja Abbas<sup>1,2,3</sup>, Petra Klepac<sup>1,4</sup>, Kevin van Zandvoort<sup>1</sup>, Hira Tanvir<sup>1</sup>, Allison Portnoy<sup>5</sup>, Mark Jit<sup>1,6,7</sup>

<sup>1</sup>Department of Infectious Disease Epidemiology, London School of Hygiene & Tropical Medicine, London, UK

<sup>2</sup>Public Health Foundation of India, New Delhi, India

<sup>3</sup>International Vaccine Institute, Seoul, South Korea

<sup>4</sup>Department of Applied Mathematics and Theoretical Physics, University of Cambridge, Cambridge, UK

<sup>5</sup>Center for Health Decision Science, Harvard T.H. Chan School of Public Health, Boston, MA, USA

<sup>6</sup>Modelling and Economics Unit, Public Health England, London, UK

<sup>7</sup>School of Public Health, University of Hong Kong, Hong Kong, SAR, China

## **Contents**

|                                                                                                                                                        |    |
|--------------------------------------------------------------------------------------------------------------------------------------------------------|----|
| Table S2. Calendar year at which low measles incidence is achieved. ....                                                                               | 2  |
| Table S3. National and total measles burden by selected scenarios and vaccine strategies. ....                                                         | 4  |
| Table S4. Averted measles burden in consideration of COVID-19 related disruptions. ....                                                                | 8  |
| Figure S3. Model estimates under different assumptions for SIA delivery to zero-dose children. ....                                                    | 9  |
| Figure S4. Model estimates of measles cases in the ‘base’ and ‘full-update’ scenarios. ....                                                            | 10 |
| Figure S5. Model estimates of (A) measles cases and (B) deaths over 2000–2050 under different assumptions of $R_0$ . ....                              | 11 |
| Figure S6. Model estimates of (A) measles cases and (B) deaths over 2000–2050 under different assumptions of $R_0$ , assuming no SIAs after 2019. .... | 12 |
| References .....                                                                                                                                       | 12 |

**Table S2. Calendar year at which low measles incidence is achieved.** Low incidence is defined as an annual incidence rate of < 1 case per million population for at least three consecutive years, denoting conditions that may be consistent with ability to achieve elimination. Model results based on the ‘base’ and ‘full-update’ scenarios (denoted as B and F, respectively) and with a vaccination strategy including MCV1, MCV2, and SIAs are presented for the 10 high measles burden countries – India, Nigeria, Pakistan, Ethiopia, Afghanistan, Sudan, Tanzania, Niger, Somalia, and DR Congo.

| Country and scenario | R <sub>0</sub> = 12                                         | R <sub>0</sub> = 16<br>(‘base’ scenario)                  | R <sub>0</sub> = 20                                                             | R <sub>0</sub> = 24                                                             |
|----------------------|-------------------------------------------------------------|-----------------------------------------------------------|---------------------------------------------------------------------------------|---------------------------------------------------------------------------------|
| India                | B 2022                                                      | 2022                                                      | Not achievable before 2050<br>(once verified in 2023, but reintroduced in 2025) | Not achievable before 2050                                                      |
|                      | F 2021                                                      | 2021                                                      | Not achievable before 2050<br>(once verified in 2021, but reintroduced in 2032) | Not achievable before 2050<br>(once verified in 2022, but reintroduced in 2026) |
| Nigeria              | B 2010                                                      | 2041<br>(once verified in 2015, but reintroduced in 2025) | 2044<br>(once verified in 2021, but reintroduced in 2022)                       | Not achievable before 2050                                                      |
|                      | F 2010                                                      | 2047<br>(once verified in 2010, but reintroduced in 2028) | Not achievable before 2050<br>(once verified in 2020, but reintroduced in 2022) | Not achievable before 2050<br>(once verified in 2021, but reintroduced in 2022) |
| Pakistan             | B 2011                                                      | 2012                                                      | 2017                                                                            | 2018                                                                            |
|                      | F 2011                                                      | 2012                                                      | 2018                                                                            | 2018                                                                            |
| Ethiopia             | B 2011                                                      | 2027<br>(once verified in 2011, but reintroduced in 2019) | 2036                                                                            | 2042                                                                            |
|                      | F 2012                                                      | 2011                                                      | 2027<br>(once verified in 2010, but reintroduced in 2019)                       | 2024                                                                            |
| Afghanistan          | B 2016<br>(once verified in 2010, but reintroduced in 2011) | 2018                                                      | 2037                                                                            | 2045                                                                            |
|                      | F 2006                                                      | 2016                                                      | 2030<br>(once verified in 2016, but reintroduced in 2023)                       | 2040                                                                            |
| Sudan                | B 2008                                                      | 2009                                                      | 2009                                                                            | 2012                                                                            |
|                      | F 2008                                                      | 2008                                                      | 2009                                                                            | 2010                                                                            |
| Tanzania             | B 2005                                                      | 2005                                                      | 2011                                                                            | 2050<br>(once verified in 2009, but reintroduced in 2028)                       |

|          |   |                                                                                          |                                                                                          |                                                                                          |                                                                                          |
|----------|---|------------------------------------------------------------------------------------------|------------------------------------------------------------------------------------------|------------------------------------------------------------------------------------------|------------------------------------------------------------------------------------------|
|          | F | 2005                                                                                     | 2005                                                                                     | 2048<br>(once verified in 2012,<br>but reintroduced in<br>2032)                          | Not achievable before<br>2050<br>(once verified in 2009,<br>but reintroduced in<br>2040) |
| Niger    | B | 2012                                                                                     | 2012                                                                                     | 2012                                                                                     | 2018<br>(once verified in 2013,<br>but reintroduced in<br>2014)                          |
|          | F | 2008                                                                                     | 2012                                                                                     | 2012                                                                                     | 2012                                                                                     |
| Somalia  | B | Not achievable before<br>2050<br>(once verified in 2011,<br>but reintroduced in<br>2022) | Not achievable before<br>2050<br>(once verified in 2014,<br>but reintroduced in<br>2021) | Not achievable before<br>2050<br>(once verified in 2015,<br>but reintroduced in<br>2020) | Not achievable before<br>2050                                                            |
|          | F | Not achievable before<br>2050<br>(once verified in 2011,<br>but reintroduced in<br>2024) | Not achievable before<br>2050<br>(once verified in 2011,<br>but reintroduced in<br>2022) | Not achievable before<br>2050<br>(once verified in 2013,<br>but reintroduced in<br>2021) | Not achievable before<br>2050<br>(once verified in 2014,<br>but reintroduced in<br>2021) |
| DR Congo | B | Not achievable before<br>2050<br>(once verified in 2010,<br>but reintroduced in<br>2021) | Not achievable before<br>2050<br>(once verified in 2016,<br>but reintroduced in<br>2020) | Not achievable before<br>2050<br>(once verified in 2016,<br>but reintroduced in<br>2018) | Not achievable before<br>2050<br>(once verified in 2016,<br>but reintroduced in<br>2018) |
|          | F | Not achievable before<br>2050<br>(once verified in 2016,<br>but reintroduced in<br>2022) | Not achievable before<br>2050<br>(once verified in 2016,<br>but reintroduced in<br>2021) | Not achievable before<br>2050<br>(once verified in 2016,<br>but reintroduced in<br>2020) | Not achievable before<br>2050<br>(once verified in 2016,<br>but reintroduced in<br>2018) |

**Table S3. National and total measles burden by selected scenarios and vaccine strategies.** Cumulative measles cases, deaths, and DALYs over 2000–2050 are presented in millions in India, Nigeria, Pakistan, Ethiopia, Afghanistan, Sudan, Tanzania, Niger, Somalia, DR Congo, and in total. Details of data sources for key determinants assumed for each scenario can be found in Table 1 in the main text.

| Scenarios/<br>country                          | No vaccination |        |       | MCV1  |        |       | MCV1 + MCV2 |        |       | MCV1 + MCV2 + SIAs |        |       |
|------------------------------------------------|----------------|--------|-------|-------|--------|-------|-------------|--------|-------|--------------------|--------|-------|
|                                                | cases          | deaths | DALYs | cases | deaths | DALYs | cases       | deaths | DALYs | cases              | deaths | DALYs |
| <b>Base</b>                                    |                |        |       |       |        |       |             |        |       |                    |        |       |
| India                                          | 1183           | 17     | 1222  | 344   | 4.3    | 293   | 205         | 2.7    | 180   | 168                | 2.3    | 150   |
| Nigeria                                        | 373            | 16     | 959   | 109   | 4.2    | 237   | 98          | 3.8    | 211   | 15                 | 0.64   | 32    |
| Pakistan                                       | 274            | 4.0    | 279   | 62    | 0.76   | 51    | 34          | 0.43   | 29    | 13                 | 0.17   | 11    |
| Ethiopia                                       | 173            | 5.9    | 406   | 63    | 1.9    | 128   | 54          | 1.7    | 108   | 7.4                | 0.24   | 14    |
| Afghanistan                                    | 57             | 2.2    | 149   | 24    | 0.85   | 56    | 21          | 0.74   | 48    | 2.5                | 0.097  | 5.8   |
| Sudan                                          | 70             | 1.7    | 115   | 12    | 0.23   | 15    | 4.3         | 0.092  | 5.7   | 1.5                | 0.035  | 2.1   |
| Tanzania                                       | 112            | 3.8    | 259   | 16    | 0.42   | 27    | 3.9         | 0.10   | 6.0   | 0.093              | 0.0025 | 0.13  |
| Niger                                          | 59             | 2.6    | 171   | 10    | 0.38   | 24    | 4.5         | 0.18   | 10    | 2.1                | 0.092  | 5.2   |
| Somalia                                        | 33             | 1.5    | 89    | 14    | 0.58   | 35    | 14          | 0.57   | 34    | 9.1                | 0.37   | 22    |
| DR Congo                                       | 175            | 7.7    | 493   | 51    | 1.9    | 121   | 47          | 1.8    | 114   | 33                 | 1.3    | 79    |
| Total                                          | 2509           | 63     | 4142  | 706   | 16     | 987   | 486         | 12     | 745   | 252                | 5.2    | 322   |
| <b>(A) CFR, Portnoy's method</b>               |                |        |       |       |        |       |             |        |       |                    |        |       |
| India                                          | -              | 12     | 867   | -     | 2.6    | 179   | -           | 2.1    | 140   | -                  | 1.9    | 126   |
| Nigeria                                        | -              | 12     | 685   | -     | 2.5    | 137   | -           | 2.3    | 125   | -                  | 0.65   | 33    |
| Pakistan                                       | -              | 7.3    | 506   | -     | 1.1    | 73    | -           | 0.73   | 49    | -                  | 0.35   | 23    |
| Ethiopia                                       | -              | 5.6    | 380   | -     | 1.5    | 96    | -           | 1.3    | 83    | -                  | 0.29   | 17    |
| Afghanistan                                    | -              | 0.81   | 54    | -     | 0.25   | 16    | -           | 0.22   | 14    | -                  | 0.049  | 3.0   |
| Sudan                                          | -              | 0.98   | 66    | -     | 0.11   | 7.0   | -           | 0.064  | 4.0   | -                  | 0.030  | 1.9   |
| Tanzania                                       | -              | 1.8    | 116   | -     | 0.13   | 8.2   | -           | 0.054  | 3.1   | -                  | 0.0023 | 0.12  |
| Niger                                          | -              | 1.8    | 119   | -     | 0.23   | 14    | -           | 0.14   | 8.3   | -                  | 0.087  | 4.8   |
| Somalia                                        | -              | 1.0    | 63    | -     | 0.33   | 19    | -           | 0.31   | 19    | -                  | 0.20   | 12    |
| DR Congo                                       | -              | 5.5    | 349   | -     | 1.1    | 67    | -           | 1.0    | 62    | -                  | 0.66   | 41    |
| Total                                          | -              | 49     | 3205  | -     | 9.9    | 616   | -           | 8.3    | 507   | -                  | 4.2    | 261   |
| <b>(B) Contact pattern, synthetic matrices</b> |                |        |       |       |        |       |             |        |       |                    |        |       |
| India                                          | 1186           | 17     | 1168  | 328   | 3.7    | 248   | 204         | 2.4    | 160   | 160                | 1.9    | 129   |
| Nigeria                                        | 369            | 16     | 927   | 106   | 3.9    | 217   | 95          | 3.5    | 194   | 14                 | 0.57   | 29    |
| Pakistan                                       | 274            | 4.0    | 276   | 61    | 0.72   | 49    | 33          | 0.42   | 28    | 12                 | 0.16   | 11    |
| Ethiopia                                       | 171            | 5.6    | 382   | 60    | 1.6    | 108   | 51          | 1.4    | 92    | 4.0                | 0.12   | 6.9   |
| Afghanistan                                    | 56             | 2.1    | 143   | 23    | 0.77   | 50    | 20          | 0.67   | 44    | 1.9                | 0.065  | 4.0   |
| Sudan                                          | 69             | 1.7    | 112   | 11    | 0.21   | 13    | 4.3         | 0.086  | 5.4   | 1.4                | 0.031  | 1.9   |
| Tanzania                                       | 110            | 3.6    | 246   | 14    | 0.34   | 22    | 3.8         | 0.093  | 5.4   | 0.11               | 0.0028 | 0.15  |
| Niger                                          | 58             | 2.4    | 162   | 9.7   | 0.33   | 21    | 4.4         | 0.17   | 9.7   | 1.2                | 0.048  | 2.7   |
| Somalia                                        | 32             | 1.3    | 83    | 13    | 0.49   | 30    | 13          | 0.48   | 29    | 7.5                | 0.27   | 16    |

|                                                                                     |      |     |      |     |      |      |     |       |     |       |        |      |
|-------------------------------------------------------------------------------------|------|-----|------|-----|------|------|-----|-------|-----|-------|--------|------|
| DR Congo                                                                            | 171  | 7.1 | 461  | 48  | 1.7  | 104  | 45  | 1.6   | 98  | 30    | 1.0    | 64   |
| Total                                                                               | 2497 | 60  | 3960 | 674 | 14   | 861  | 473 | 11    | 664 | 232   | 4.2    | 264  |
| <b>(B') Contact pattern, proportional mixing</b>                                    |      |     |      |     |      |      |     |       |     |       |        |      |
| India                                                                               | 1133 | 14  | 1004 | 277 | 3.0  | 195  | 178 | 2.0   | 132 | 122   | 1.5    | 96   |
| Nigeria                                                                             | 362  | 15  | 894  | 100 | 3.7  | 207  | 90  | 3.4   | 187 | 14    | 0.59   | 30   |
| Pakistan                                                                            | 263  | 3.5 | 245  | 51  | 0.57 | 38   | 28  | 0.34  | 23  | 11    | 0.14   | 9.0  |
| Ethiopia                                                                            | 166  | 5.3 | 365  | 55  | 1.6  | 103  | 47  | 1.4   | 88  | 6.7   | 0.22   | 13   |
| Afghanistan                                                                         | 54   | 2.0 | 133  | 21  | 0.70 | 45   | 18  | 0.61  | 39  | 2.1   | 0.076  | 4.6  |
| Sudan                                                                               | 67   | 1.6 | 105  | 10  | 0.19 | 12   | 3.8 | 0.079 | 4.9 | 1.4   | 0.031  | 1.9  |
| Tanzania                                                                            | 109  | 3.6 | 241  | 14  | 0.35 | 23   | 3.6 | 0.098 | 5.6 | 0.085 | 0.0023 | 0.12 |
| Niger                                                                               | 57   | 2.5 | 164  | 10  | 0.37 | 23   | 4.8 | 0.19  | 11  | 2.1   | 0.091  | 5.1  |
| Somalia                                                                             | 32   | 1.4 | 84   | 13  | 0.53 | 32   | 13  | 0.51  | 30  | 7.8   | 0.30   | 18   |
| DR Congo                                                                            | 169  | 7.2 | 462  | 46  | 1.7  | 107  | 43  | 1.6   | 100 | 29    | 1.1    | 66   |
| Total                                                                               | 2411 | 57  | 3697 | 597 | 13   | 784  | 429 | 10    | 621 | 196   | 4.0    | 243  |
| <b>(B'') Contact pattern, uniform mixing</b>                                        |      |     |      |     |      |      |     |       |     |       |        |      |
| India                                                                               | 1189 | 13  | 916  | 311 | 2.9  | 178  | 211 | 2.0   | 123 | 123   | 1.2    | 78   |
| Nigeria                                                                             | 332  | 12  | 672  | 80  | 2.4  | 129  | 73  | 2.2   | 118 | 11    | 0.35   | 17   |
| Pakistan                                                                            | 261  | 3.0 | 203  | 50  | 0.47 | 29   | 30  | 0.29  | 18  | 9.4   | 0.095  | 6.0  |
| Ethiopia                                                                            | 161  | 4.3 | 290  | 49  | 1.2  | 72   | 42  | 1.0   | 62  | 0.41  | 0.0099 | 0.54 |
| Afghanistan                                                                         | 53   | 1.6 | 107  | 19  | 0.52 | 32   | 17  | 0.45  | 28  | 0.97  | 0.029  | 1.7  |
| Sudan                                                                               | 64   | 1.2 | 82   | 8.8 | 0.14 | 8.3  | 4.4 | 0.071 | 4.1 | 1.1   | 0.020  | 1.2  |
| Tanzania                                                                            | 100  | 2.7 | 180  | 10  | 0.23 | 14   | 4.0 | 0.093 | 4.8 | 0.17  | 0.0038 | 0.19 |
| Niger                                                                               | 50   | 1.8 | 116  | 7.0 | 0.21 | 12   | 4.2 | 0.13  | 7.4 | 0.90  | 0.031  | 1.7  |
| Somalia                                                                             | 29   | 1.0 | 62   | 11  | 0.33 | 19   | 10  | 0.32  | 19  | 4.5   | 0.14   | 8.1  |
| DR Congo                                                                            | 155  | 5.4 | 345  | 36  | 1.1  | 65   | 34  | 1.1   | 62  | 18    | 0.54   | 32   |
| Total                                                                               | 2395 | 46  | 2973 | 582 | 9.5  | 560  | 430 | 7.6   | 445 | 170   | 2.5    | 147  |
| <b>(C) First-dose vaccine efficacy, linear trend by age</b>                         |      |     |      |     |      |      |     |       |     |       |        |      |
| India                                                                               | -    | -   | -    | 432 | 5.6  | 384  | 236 | 3.1   | 209 | 187   | 2.6    | 171  |
| Nigeria                                                                             | -    | -   | -    | 136 | 5.4  | 305  | 120 | 4.7   | 265 | 22    | 0.89   | 46   |
| Pakistan                                                                            | -    | -   | -    | 85  | 1.1  | 73   | 39  | 0.51  | 34  | 15    | 0.20   | 13   |
| Ethiopia                                                                            | -    | -   | -    | 74  | 2.3  | 155  | 60  | 1.9   | 123 | 12    | 0.38   | 23   |
| Afghanistan                                                                         | -    | -   | -    | 27  | 0.98 | 65   | 23  | 0.82  | 53  | 2.9   | 0.11   | 6.9  |
| Sudan                                                                               | -    | -   | -    | 18  | 0.37 | 24   | 5.6 | 0.12  | 7.6 | 1.7   | 0.040  | 2.4  |
| Tanzania                                                                            | -    | -   | -    | 26  | 0.73 | 49   | 6.4 | 0.18  | 11  | 0.24  | 0.0062 | 0.34 |
| Niger                                                                               | -    | -   | -    | 15  | 0.58 | 37   | 6.2 | 0.24  | 14  | 2.3   | 0.10   | 5.6  |
| Somalia                                                                             | -    | -   | -    | 16  | 0.67 | 40   | 16  | 0.64  | 38  | 11    | 0.43   | 26   |
| DR Congo                                                                            | -    | -   | -    | 63  | 2.5  | 157  | 59  | 2.3   | 145 | 42    | 1.6    | 104  |
| Total                                                                               | -    | -   | -    | 893 | 20   | 1288 | 570 | 15    | 900 | 295   | 6.4    | 399  |
| <b>(D) SIA delivery to zero-dose population, dependency on previous vaccination</b> |      |     |      |     |      |      |     |       |     |       |        |      |

|             |   |   |   |   |   |   |   |   |   |   |       |        |      |
|-------------|---|---|---|---|---|---|---|---|---|---|-------|--------|------|
| India       | - | - | - | - | - | - | - | - | - | - | 160   | 2.2    | 144  |
| Nigeria     | - | - | - | - | - | - | - | - | - | - | 15    | 0.64   | 32   |
| Pakistan    | - | - | - | - | - | - | - | - | - | - | 13    | 0.17   | 11   |
| Ethiopia    | - | - | - | - | - | - | - | - | - | - | 7.1   | 0.23   | 14   |
| Afghanistan | - | - | - | - | - | - | - | - | - | - | 2.7   | 0.10   | 5.9  |
| Sudan       | - | - | - | - | - | - | - | - | - | - | 1.5   | 0.035  | 2.1  |
| Tanzania    | - | - | - | - | - | - | - | - | - | - | 0.094 | 0.0025 | 0.14 |
| Niger       | - | - | - | - | - | - | - | - | - | - | 2.1   | 0.091  | 5.1  |
| Somalia     | - | - | - | - | - | - | - | - | - | - | 9.0   | 0.36   | 22   |
| DR Congo    | - | - | - | - | - | - | - | - | - | - | 32    | 1.2    | 77   |
| Total       | - | - | - | - | - | - | - | - | - | - | 243   | 5.0    | 313  |

**(D') SIA delivery to zero-dose population, dependency on previous vaccination, excluding the largest survey**

|             |   |   |   |   |   |   |   |   |   |   |       |        |      |
|-------------|---|---|---|---|---|---|---|---|---|---|-------|--------|------|
| India       | - | - | - | - | - | - | - | - | - | - | 163   | 2.2    | 146  |
| Nigeria     | - | - | - | - | - | - | - | - | - | - | 15    | 0.63   | 32   |
| Pakistan    | - | - | - | - | - | - | - | - | - | - | 13    | 0.17   | 11   |
| Ethiopia    | - | - | - | - | - | - | - | - | - | - | 7.2   | 0.24   | 14   |
| Afghanistan | - | - | - | - | - | - | - | - | - | - | 2.5   | 0.095  | 5.7  |
| Sudan       | - | - | - | - | - | - | - | - | - | - | 1.6   | 0.035  | 2.1  |
| Tanzania    | - | - | - | - | - | - | - | - | - | - | 0.090 | 0.0024 | 0.13 |
| Niger       | - | - | - | - | - | - | - | - | - | - | 2.1   | 0.091  | 5.1  |
| Somalia     | - | - | - | - | - | - | - | - | - | - | 9.0   | 0.36   | 22   |
| DR Congo    | - | - | - | - | - | - | - | - | - | - | 33    | 1.2    | 78   |
| Total       | - | - | - | - | - | - | - | - | - | - | 246   | 5.1    | 316  |

**(D'') SIA delivery to zero-dose population, 7.7% never reached**

|             |   |   |   |   |   |   |   |   |   |   |      |       |     |
|-------------|---|---|---|---|---|---|---|---|---|---|------|-------|-----|
| India       | - | - | - | - | - | - | - | - | - | - | 192  | 2.5   | 170 |
| Nigeria     | - | - | - | - | - | - | - | - | - | - | 56   | 2.2   | 120 |
| Pakistan    | - | - | - | - | - | - | - | - | - | - | 28   | 0.36  | 24  |
| Ethiopia    | - | - | - | - | - | - | - | - | - | - | 46   | 1.4   | 91  |
| Afghanistan | - | - | - | - | - | - | - | - | - | - | 6.4  | 0.24  | 15  |
| Sudan       | - | - | - | - | - | - | - | - | - | - | 2.9  | 0.063 | 3.9 |
| Tanzania    | - | - | - | - | - | - | - | - | - | - | 0.87 | 0.023 | 1.3 |
| Niger       | - | - | - | - | - | - | - | - | - | - | 2.4  | 0.10  | 5.8 |
| Somalia     | - | - | - | - | - | - | - | - | - | - | 13   | 0.52  | 31  |
| DR Congo    | - | - | - | - | - | - | - | - | - | - | 44   | 1.7   | 104 |
| Total       | - | - | - | - | - | - | - | - | - | - | 390  | 9.1   | 566 |

**Full-update**

|          |      |     |     |     |     |     |     |      |     |     |      |     |
|----------|------|-----|-----|-----|-----|-----|-----|------|-----|-----|------|-----|
| India    | 1186 | 12  | 814 | 412 | 2.7 | 180 | 228 | 2.0  | 133 | 168 | 1.7  | 111 |
| Nigeria  | 369  | 11  | 656 | 131 | 2.8 | 154 | 116 | 2.5  | 136 | 15  | 0.62 | 31  |
| Pakistan | 274  | 7.2 | 500 | 83  | 1.4 | 96  | 38  | 0.82 | 55  | 14  | 0.39 | 25  |

|             |      |      |      |     |      |     |     |       |     |      |        |      |
|-------------|------|------|------|-----|------|-----|-----|-------|-----|------|--------|------|
| Ethiopia    | 171  | 5.2  | 350  | 70  | 1.4  | 92  | 57  | 1.2   | 76  | 4.6  | 0.16   | 9.6  |
| Afghanistan | 56   | 0.77 | 51   | 26  | 0.25 | 16  | 22  | 0.22  | 14  | 2.3  | 0.037  | 2.2  |
| Sudan       | 69   | 0.95 | 64   | 17  | 0.14 | 9.4 | 5.7 | 0.074 | 4.6 | 1.6  | 0.030  | 1.8  |
| Tanzania    | 110  | 1.7  | 109  | 24  | 0.18 | 12  | 6.3 | 0.075 | 4.4 | 0.10 | 0.0023 | 0.12 |
| Niger       | 58   | 1.7  | 111  | 14  | 0.28 | 17  | 5.9 | 0.16  | 9.0 | 1.3  | 0.053  | 2.9  |
| Somalia     | 32   | 0.95 | 58   | 15  | 0.30 | 18  | 14  | 0.29  | 17  | 8.7  | 0.16   | 9.8  |
| DR Congo    | 171  | 5.0  | 319  | 59  | 1.1  | 69  | 55  | 1.0   | 64  | 37   | 0.62   | 39   |
| Total       | 2497 | 46   | 3031 | 851 | 11   | 664 | 548 | 8.3   | 513 | 253  | 3.8    | 233  |

**Table S4. Averted measles burden in consideration of COVID-19 related disruptions.** As presented in Table 2 in the main text, total vaccine-averted burden cases, deaths, DALYs and proportionate change from the 'base' scenario (parentheses) in ten high measles burden countries over 2000–2050 are shown. These model estimates were generated under the modified projections for coverage and case-fatality risk estimates affected by the COVID-19 pandemic. All model scenarios were conducted under the assumption of  $R_0 = 16$ .

| Scenarios                                                                                                   | MCV1             |                  |                  | MCV1 + MCV2     |                  |                  | MCV1 + MCV2 + SIAs |                  |                  |
|-------------------------------------------------------------------------------------------------------------|------------------|------------------|------------------|-----------------|------------------|------------------|--------------------|------------------|------------------|
|                                                                                                             | Cases, millions  | Deaths, millions | DALYs, millions  | Cases, millions | Deaths, millions | DALYs, millions  | Cases, millions    | Deaths, millions | DALYs, millions  |
| Base                                                                                                        | 1790<br>(ref)    | 46.9<br>(ref)    | 3127<br>(ref)    | 2006<br>(ref)   | 50.3<br>(ref)    | 3362<br>(ref)    | 2248<br>(ref)      | 57.4<br>(ref)    | 3798<br>(ref)    |
| (A) CFR, Portnoy's method                                                                                   | -                | 39.1<br>(-16.7%) | 2576<br>(-17.6%) | -               | 40.6<br>(-19.3%) | 2683<br>(-20.2%) | -                  | 44.8<br>(-22.1%) | 2935<br>(-22.7%) |
| (B) Contact pattern, synthetic matrices                                                                     | 1813<br>(1.2%)   | 46.1<br>(-1.7%)  | 3075<br>(-1.7%)  | 2009<br>(0.15%) | 48.9<br>(-2.8%)  | 3268<br>(-2.8%)  | 2258<br>(0.47%)    | 55.7<br>(-3.0%)  | 3683<br>(-3.0%)  |
| (B') Contact pattern, proportional mixing                                                                   | 1804<br>(0.76%)  | 43.5<br>(-7.2%)  | 2891<br>(-7.5%)  | 1969<br>(-1.9%) | 45.9<br>(-8.7%)  | 3050<br>(-9.3%)  | 2210<br>(-1.7%)    | 52.4<br>(-8.7%)  | 3443<br>(-9.4%)  |
| (B'') Contact pattern, uniform mixing                                                                       | 1805<br>(0.80%)  | 36.2<br>(-22.7%) | 2399<br>(-23.3%) | 1952<br>(-2.7%) | 38.1<br>(-24.4%) | 2510<br>(-25.3%) | 2211<br>(-1.6%)    | 43.4<br>(-24.5%) | 2818<br>(-25.8%) |
| (C) Age-dependent vaccine efficacy, linear trend                                                            | 1605<br>(-10.3%) | 42.4<br>(-9.6%)  | 2828<br>(-9.6%)  | 1922<br>(-4.2%) | 47.8<br>(-4.9%)  | 3206<br>(-4.7%)  | 2201<br>(-2.1%)    | 56.2<br>(-2.2%)  | 3717<br>(-2.1%)  |
| (D) SIA delivery to zero-dose population, dependency on previous vaccination                                | -                | -                | -                | -               | -                | -                | 2257<br>(0.42%)    | 57.6<br>(0.29%)  | 3809<br>(0.29%)  |
| (D') SIA delivery to zero-dose population, dependency on previous vaccination, excluding the largest survey | -                | -                | -                | -               | -                | -                | 2257<br>(0.42%)    | 57.7<br>(0.43%)  | 3813<br>(0.39%)  |
| (D'') SIA delivery to zero-dose population, 7.7% never reached                                              | -                | -                | -                | -               | -                | -                | 2104<br>(-6.4%)    | 53.3<br>(-7.2%)  | 3545<br>(-6.7%)  |
| Full-update                                                                                                 | 1636<br>(-8.6%)  | 35.7<br>(-23.8%) | 2357<br>(-24.6%) | 1933<br>(-3.7%) | 37.9<br>(-24.8%) | 2505<br>(-25.5%) | 2237<br>(0.50%)    | 42.5<br>(-26.0%) | 2791<br>(-26.5%) |



**Figure S3. Model estimates under different assumptions for SIA delivery to zero-dose children.** Measles burden estimates were conducted based on the ‘base’ scenario, under the assumption of  $R_0 = 16$  and with the implementation of MCV1, MCV2, and SIAs. Four different approaches for distributing SIA doses between zero-dose children and already-vaccinated children. Apart from the other three approaches, assuming that 7.7% of children are never reached for any MCV dose [1] and randomly delivering SIA doses to the rest would result in greater and more persistent measles burden over 2000–2050.

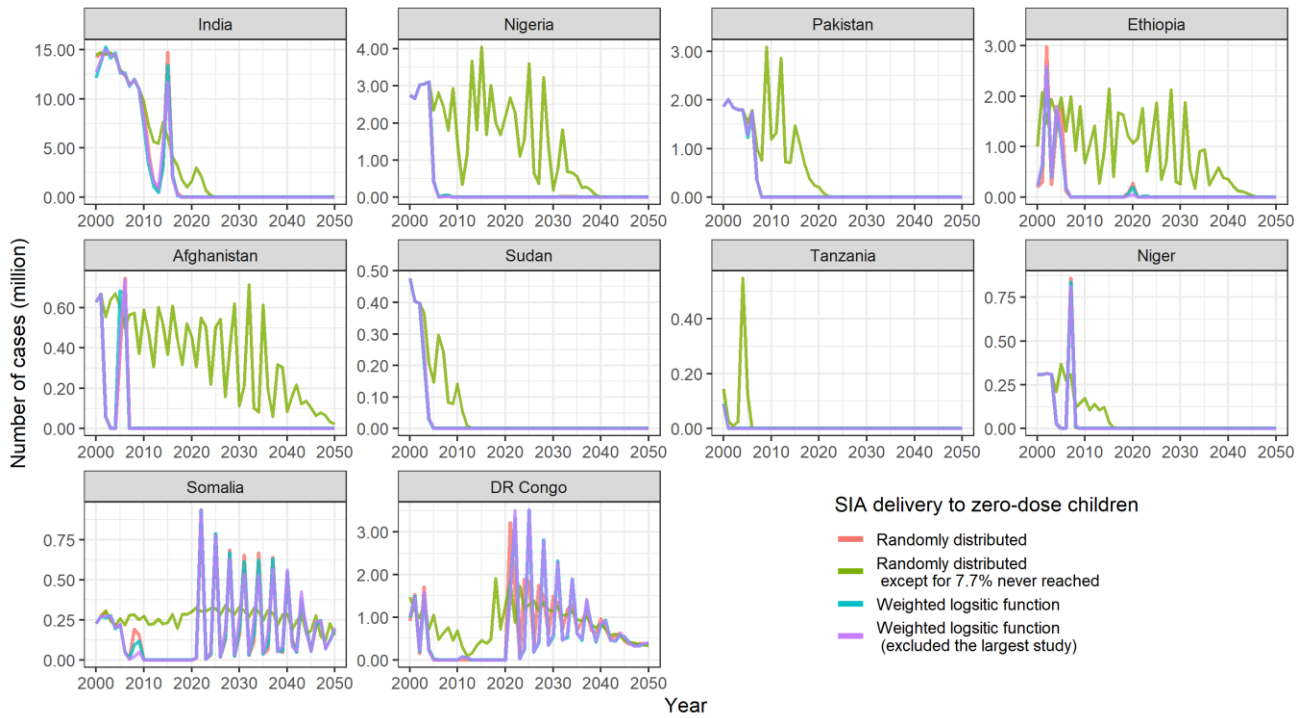

**Figure S4. Model estimates of measles cases in the ‘base’ and ‘full-update’ scenarios.** Number of measles cases were estimated under the assumption of  $R_0 = 12, 16, 20,$  and  $24,$  and with the implementation of MCV1, MCV2, and SIAs. Model-based estimates were used to compare with data from Institute for Health Metrics and Evaluation [2] and notifications from World Health Organization [3].

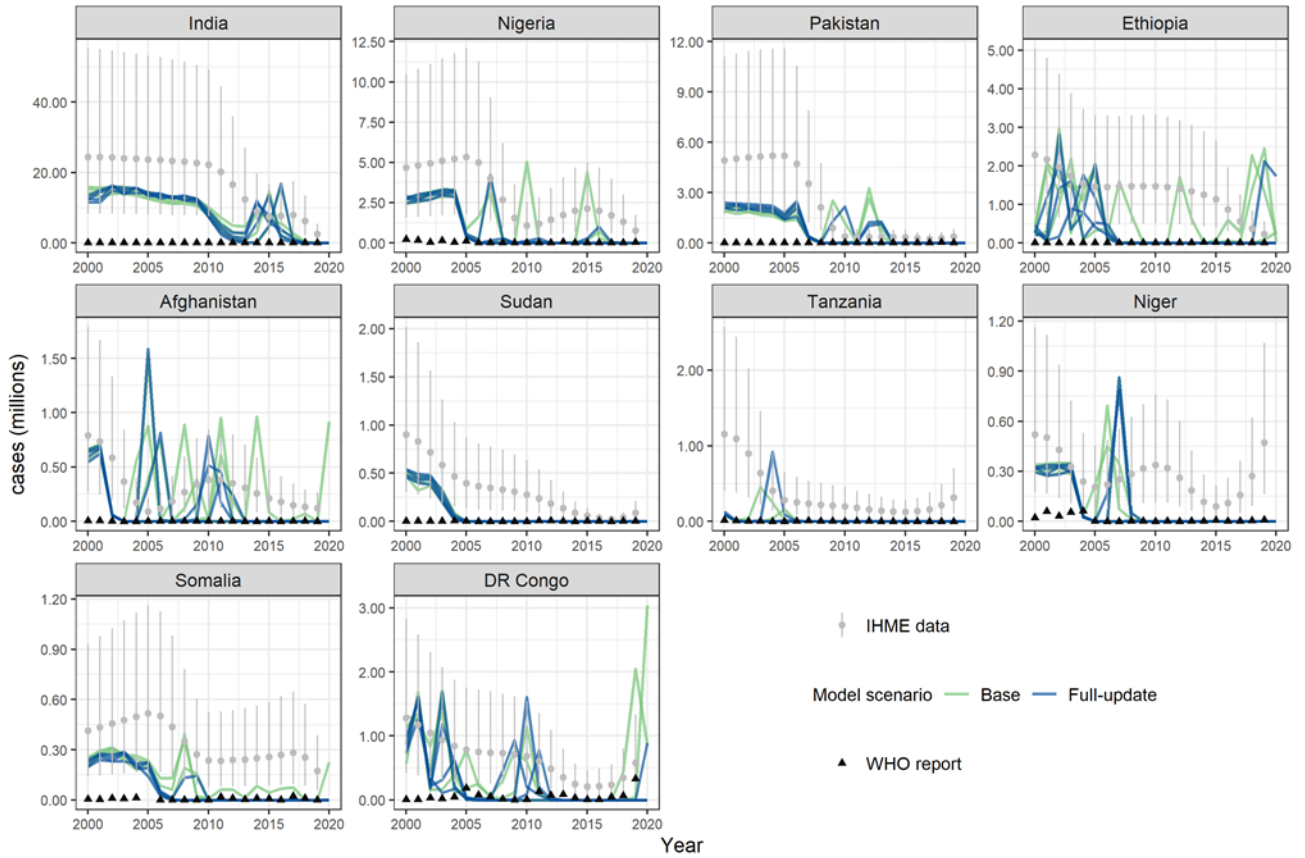

**Figure S5. Model estimates of (A) measles cases and (B) deaths over 2000–2050 under different assumptions of  $R_0$ .** Measles burden estimates based on the ‘full-update’ scenario and the vaccination strategy that includes MCV1, MCV2, and SIAs are used for comparing with estimates from IHME [2] and notifications from WHO [3].

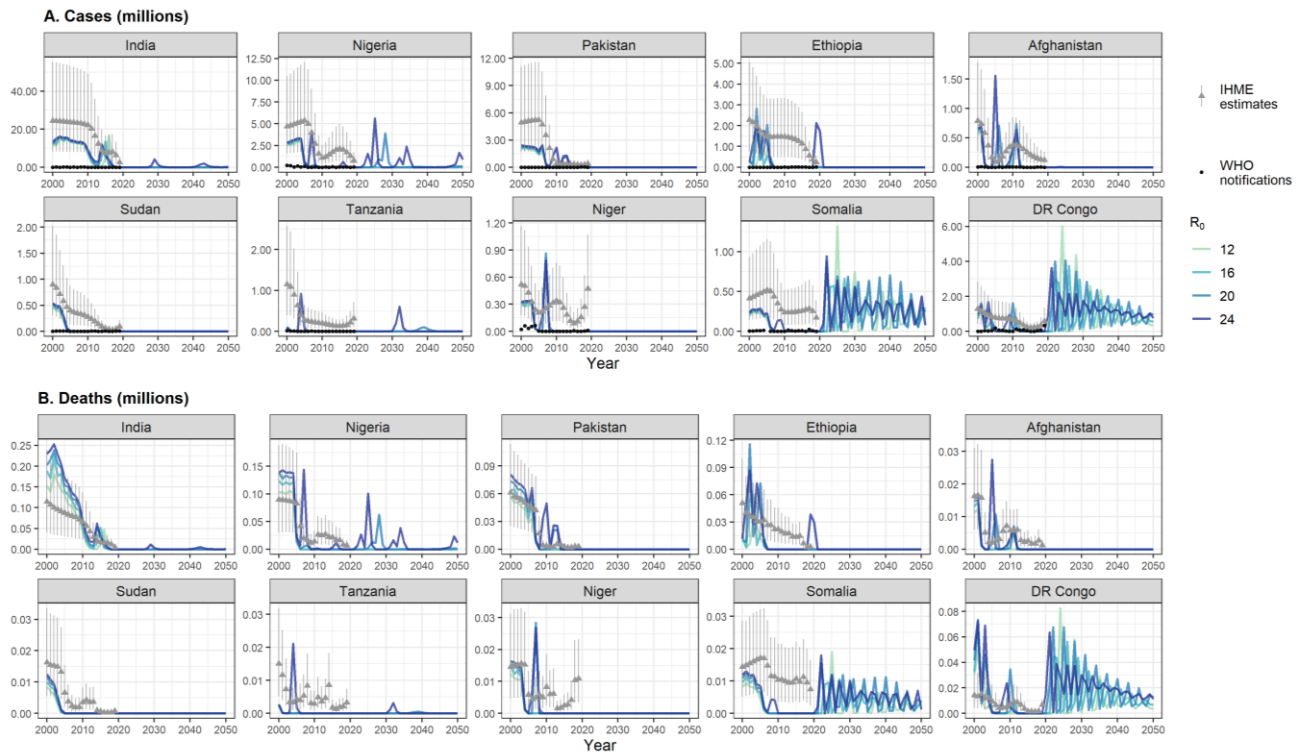

**Figure S6. Model estimates of (A) measles cases and (B) deaths over 2000–2050 under different assumptions of  $R_0$ , assuming no SIAs after 2019.** As described in the caption of Supplementary Figure 6, but no SIAs are implemented after 2020 (0% coverage) in this projection.

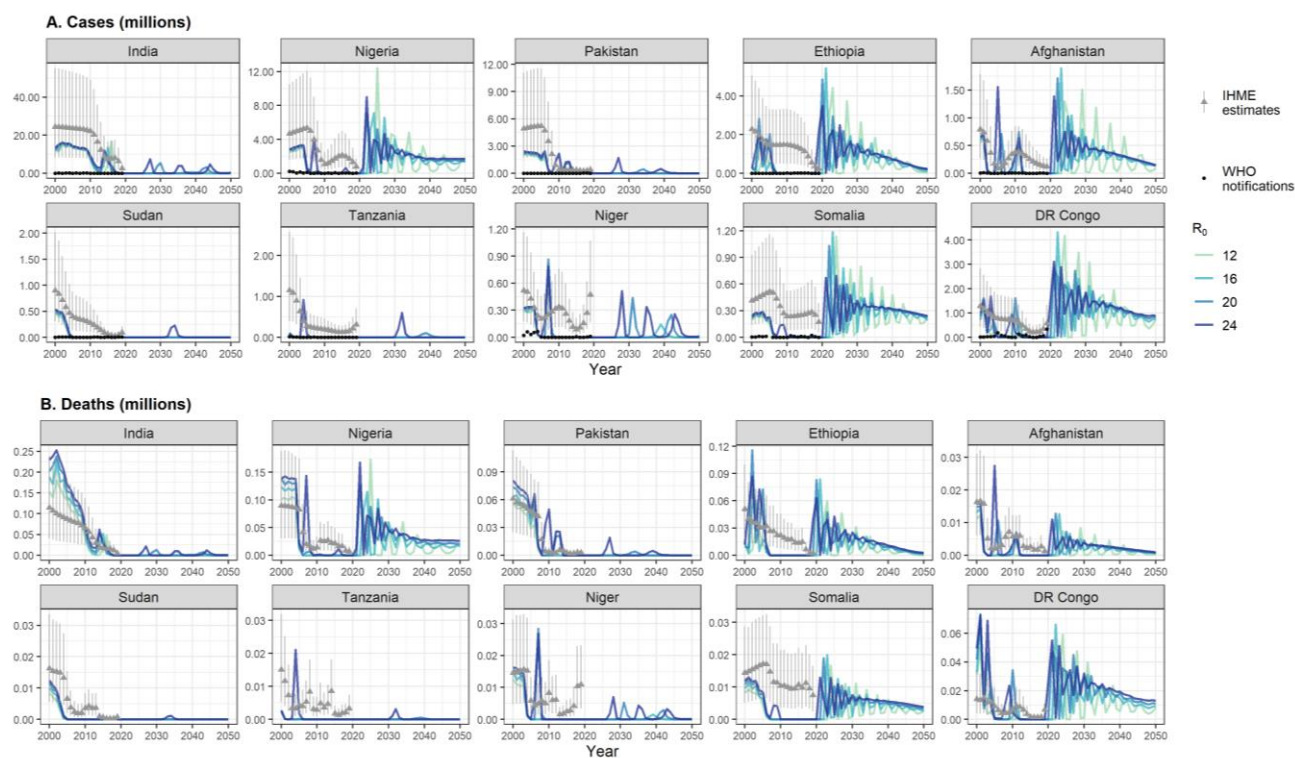

## References

1. Cata-Preta BO, Santos TM, Mengistu T, Hogan DR, Barros AJD, Victora CG: **Zero-dose children and the immunisation cascade: Understanding immunisation pathways in low and middle-income countries.** *Vaccine* 2021, **39**(32):4564-4570.
2. Global Burden of Disease Collaborative Network: **Global Burden of Disease Study 2019 (GBD 2019) Results.** In. Seattle, United States: Institute for Health Metrics and Evaluation (IHME); 2020.
3. World Health Organization: **Provisional monthly measles and rubella data.** In: *2011-2020.* 2021.
